# Supplementary material for: Fulvestrant Plus Vistusertib vs Fulvestrant Plus Everolimus vs Fulvestrant Alone for Women With Hormone Receptor–Positive Metastatic Breast Cancer: The MANTA Phase 2 Randomized Clinical Trial
Source: PubMed Central journal article supplement — JAMA Oncol. 2019 Aug 29;5(11):1556–63. doi: 10.1001/jamaoncol.2019.2526 (PMC6865233; doi:10.1001/jamaoncol.2019.2526), 2019-08-29
Supplement: jamaoncol-5-1556-s002.pdf [file jamaoncol-5-1556-s002.pdf]

## Supplementary Online Content

Schmid P, Zaiss M, Harper-Wynne C, et al. Fulvestrant plus vistusertib vs fulvestrant plus everolimus vs fulvestrant alone for women with hormone receptor–positive metastatic breast cancer: the MANTA phase 2 randomized clinical trial. *JAMA Oncol*. Published online August 29, 2019.

doi:10.1001/jamaoncol.2019.2526

**eTable 1.** Treated Patient Demographics and Disease Characteristics at Baseline

**eTable 2.** Adverse Events Occurring in  $\geq 10\%$  in the Safety Population; the Safety Population Includes All Patients Who Received at Least One Dose of the Study Drug

This supplementary material has been provided by the authors to give readers additional information about their work.

**eTable 1.** Treated Patient Demographics and Disease Characteristics at Baseline

|                                  |                        | Fulvestrant plus daily vistusertib | Fulvestrant plus intermittent vistusertib | Fulvestrant | Fulvestrant plus everolimus |
|----------------------------------|------------------------|------------------------------------|-------------------------------------------|-------------|-----------------------------|
|                                  |                        | (N = 101)                          | (N = 95)                                  | (N = 66)    | (N = 64)                    |
| Age (years), median (IQR)        |                        | 63 (55-70)                         | 64 (55-68)                                | 63 (55-68)  | 63 (58-72)                  |
| Measurable disease               |                        |                                    |                                           |             |                             |
|                                  | Yes                    | 76 (75%)                           | 77 (81%)                                  | 50 (76%)    | 51 (80%)                    |
|                                  | No                     | 25 (25%)                           | 18 (19%)                                  | 16 (24%)    | 13 (20%)                    |
| Sites of metastatic disease      |                        |                                    |                                           |             |                             |
|                                  | Visceral               | 64 (63%)                           | 53 (56%)                                  | 41 (62%)    | 44 (69%)                    |
|                                  | Bone-only              | 24 (24%)                           | 21 (22%)                                  | 18 (27%)    | 11 (17%)                    |
|                                  | Other <sup>1</sup>     | 13 (13%)                           | 21 (22%)                                  | 7 (11%)     | 9 (14%)                     |
| Number of metastatic             |                        |                                    |                                           |             |                             |
|                                  | 1                      | 36 (36%)                           | 30 (32%)                                  | 29 (44%)    | 24 (38%)                    |
|                                  | 2                      | 30 (30%)                           | 34 (36%)                                  | 19 (29%)    | 20 (31%)                    |
|                                  | ≥3                     | 35 (35%)                           | 31 (33%)                                  | 18 (27%)    | 19 (30%)                    |
| Endocrine resistance             |                        |                                    |                                           |             |                             |
|                                  | Secondary <sup>2</sup> | 86 (85%)                           | 83 (87%)                                  | 55 (83%)    | 58 (91%)                    |
|                                  | Primary                | 15 (15%)                           | 12 (13%)                                  | 11 (17%)    | 6 (9%)                      |
| Prior lines of therapy for ABC   |                        |                                    |                                           |             |                             |
|                                  | None                   | 38 (38%)                           | 41 (43%)                                  | 24 (36%)    | 24 (38%)                    |
|                                  | 1                      | 30 (30%)                           | 29 (31%)                                  | 25 (38%)    | 20 (31%)                    |
|                                  | ≥2                     | 33 (33%)                           | 25 (26%)                                  | 17 (26%)    | 20 (31%)                    |
| Number of prior ET for ABC       |                        |                                    |                                           |             |                             |
|                                  | None                   | 44 (44%)                           | 45 (47%)                                  | 29 (44%)    | 27 (42%)                    |
|                                  | 1                      | 45 (45%)                           | 36 (38%)                                  | 27 (41%)    | 25 (39%)                    |
|                                  | ≥2                     | 12 (12%)                           | 14 (15%)                                  | 10 (15%)    | 12 (19%)                    |
| Prior (neo)adjuvant chemotherapy |                        |                                    |                                           |             |                             |
|                                  | Yes                    | 63 (62%)                           | 56 (59%)                                  | 47 (71%)    | 38 (59%)                    |
|                                  | No                     | 38 (38%)                           | 39 (41%)                                  | 19 (29%)    | 26 (41%)                    |
| Prior metastatic chemotherapy    |                        |                                    |                                           |             |                             |
|                                  | Yes                    | 24 (24%)                           | 24 (25%)                                  | 13 (20%)    | 14 (22%)                    |

|  |    |          |          |          |          |
|--|----|----------|----------|----------|----------|
|  | No | 77 (76%) | 71 (75%) | 53 (80%) | 50 (78%) |
|--|----|----------|----------|----------|----------|

*ABC = advanced breast cancer; ET = endocrine therapy; IQR = interquartile range.*

*Summaries are presented as counts and percentages unless otherwise stated.*

<sup>1</sup> *Other = no visceral metastases, but can have bone metastases in addition to others; including locally advanced breast cancer.*

<sup>2</sup> *Secondary endocrine resistance is defined as (i)  $\geq 24$  months of adjuvant ET before recurrence or (ii) CR or PR or SD for  $\geq 24$  weeks with  $\geq 1$  ET for MBC; all other patients are classified as primary resistance.*

**eTable 2.** Adverse Events Occurring in  $\geq 10\%$  in the Safety Population; the Safety Population Includes All Patients Who Received at Least One Dose of the Study Drug

|                         | Fulvestrant plus daily vistusertib (N = 92) |           | Fulvestrant plus intermittent vistusertib (N = 92) |           | Fulvestrant (N = 56) |           | Fulvestrant plus everolimus (N= 60) |           |
|-------------------------|---------------------------------------------|-----------|----------------------------------------------------|-----------|----------------------|-----------|-------------------------------------|-----------|
|                         | All grades                                  | Grade 3/4 | All grades                                         | Grade 3/4 | All grades           | Grade 3/4 | All grades                          | Grade 3/4 |
| Asthenia                | 34.8                                        | 2.2       | 45.7                                               | 5.4       | 16.1                 | 0         | 53.3                                | 3.3       |
| Nausea                  | 31.5                                        | 0         | 68.5                                               | 3.3       | 12.5                 | 0         | 26.7                                | 0         |
| Rash                    | 54.3                                        | 20.7      | 22.8                                               | 4.3       | 0                    | 0         | 50.0                                | 5.0       |
| Stomatitis              | 40.2                                        | 13.0      | 29.3                                               | 4.3       | 0                    | 0         | 60.0                                | 11.7      |
| Diarrhoea               | 25.0                                        | 2.2       | 35.9                                               | 5.4       | 5.4                  | 0         | 31.7                                | 1.7       |
| Decreased appetite      | 16.3                                        | 0         | 32.6                                               | 0         | 5.4                  | 0         | 30.0                                | 1.7       |
| Vomiting                | 12.0                                        | 1.1       | 40.2                                               | 5.4       | 0                    | 0         | 11.7                                | 0         |
| Headache                | 9.8                                         | 1.1       | 22.8                                               | 2.2       | 12.5                 | 0         | 18.3                                | 0         |
| Pruritus                | 23.9                                        | 2.2       | 12.0                                               | 3.3       | 1.8                  | 0         | 16.7                                | 0         |
| Musculoskeletal pain    | 9.8                                         | 1.1       | 16.3                                               | 2.2       | 10.7                 | 0         | 13.3                                | 0         |
| Dry mouth               | 13.0                                        | 0         | 12.0                                               | 0         | 3.6                  | 0         | 20.0                                | 0         |
| Skin injury             | 14.1                                        | 1.1       | 9.8                                                | 0         | 0                    | 0         | 25.0                                | 0         |
| Infection               | 15.2                                        | 5.4       | 10.9                                               | 1.1       | 3.6                  | 0         | 16.7                                | 6.7       |
| Injection site reaction | 12.0                                        | 1.1       | 10.9                                               | 0         | 8.9                  | 0         | 15.0                                | 0         |
| Oral pain               | 10.9                                        | 3.3       | 12.0                                               | 0         | 0                    | 0         | 21.7                                | 0         |
| Dysgeusia               | 5.4                                         | 0         | 16.3                                               | 0         | 3.6                  | 0         | 18.3                                | 0         |

Summaries are presented as percentages. Percentages are based on N (the total number of patients with at least one AE [regardless of grade] in the specified arm).
