# Supplementary material for: Fulvestrant Plus Vistusertib vs Fulvestrant Plus Everolimus vs Fulvestrant Alone for Women With Hormone Receptor–Positive Metastatic Breast Cancer: The MANTA Phase 2 Randomized Clinical Trial
Source: PubMed Central journal article supplement — JAMA Oncol. 2019 Aug 29;5(11):1556–63. doi: 10.1001/jamaoncol.2019.2526 (PMC6865233; doi:10.1001/jamaoncol.2019.2526), 2019-08-29
Supplement: jamaoncol-5-1556-s003.pdf [file jamaoncol-5-1556-s003.pdf]

## **Data Sharing Statement**

Schmid. Fulvestrant Plus Vistusertib vs Fulvestrant Plus Everolimus vs Fulvestrant Alone for Women With Hormone Receptor-Positive Metastatic Breast Cancer. *JAMA Oncol*. Published August 29, 2019. 10.1001/jamaoncol.2019.2526

### **Data**

**Data available:** No
